# Supplementary material for: PrEP Implementation Science: State-of-the-Art and Research Agenda
Source: PubMed Central journal article supplement (PMC4581083; doi:10.7448/ias.18.4.20527), 2015-07-20
Supplement: JIAS-18-20013-S001.pdf [file JIAS-18-20013-S001.pdf]

## **Appendix**

**Pre-exposure prophylaxis targeted to high-risk serodiscordant couples as a bridge to sustained ART use has the potential to cost-effectively reduce HIV incidence in Kampala, Uganda**

**Table 1. Total Costs by Resource Type and Allocation.**

| <b>Resource Type</b>  | <b>As Studied</b>   |                  | <b>Ministry of Health</b> |                  |
|-----------------------|---------------------|------------------|---------------------------|------------------|
|                       | <b>Current Care</b> | <b>PrEP</b>      | <b>Current Care</b>       | <b>PrEP</b>      |
| Start-up              | \$0                 | \$7,273          | \$0                       | \$7,273          |
| Personnel             | \$36,043            | \$33,877         | \$8,367                   | \$5,626          |
| Transport             | \$1,607             | \$1,607          | \$1,607                   | \$1,607          |
| Laboratory Monitoring | \$23,913            | \$195,004        | \$34,560                  | \$38,239         |
| Medication            | \$324,142           | \$117,614        | \$280,583                 | \$41,665         |
| Office Supplies       | \$71,363            | \$7,929          | \$71,363                  | \$7,929          |
| <b>Total</b>          | <b>\$457,068</b>    | <b>\$363,304</b> | <b>\$396,480</b>          | <b>\$102,339</b> |

**Table 2. Cost Assumptions in Study and Ministry of Health Setting.** Staff salaries in Ministry of Health are adjusted from 2009 using Ugandan CPI.

| Staff Position         | Value in Study                      |                       | Value in Ministry of Health         |                       |
|------------------------|-------------------------------------|-----------------------|-------------------------------------|-----------------------|
|                        | Annual Salary (USD)                 | No. of Staff          | Annual Salary (USD) [1]             | No. of Staff          |
| Administrator          | \$30,000                            | 0.7                   | \$5,496                             | 1                     |
| Study Coordinator      | \$15,000                            | 0.05                  | \$4,263                             | 0                     |
| Clinician              | \$15,000                            | 1                     | \$5,496                             | 0.05                  |
| Nurse Counselor        | \$10,000                            | 1                     | \$3,926                             | 1                     |
| Counselor              | \$10,000                            | 3.6                   | \$1,823                             | 4                     |
| Community Recruiter    | \$10,000                            | 2.8                   | \$1,823                             | 0.5                   |
| Pharmacist             | \$10,000                            | 1.1                   | \$1,823                             | 1                     |
| Laboratory Technician  | \$10,000                            | 1                     | \$1,823                             | 1                     |
| Data Manager           | \$10,000                            | 4                     | \$1,823                             | 0                     |
| Driver                 | \$7,000                             | 3                     | \$1,085                             | 1                     |
| <b>Laboratory Test</b> | <b>Cost per Test (USD)</b>          | <b>Tests per Year</b> | <b>Cost per Test (USD)</b>          | <b>Tests per Year</b> |
| Viral Load Test        | \$63.25                             | 3                     | \$20                                | 2                     |
| HBV Test               | \$25                                | 1                     | \$0.50                              | 1                     |
| CD4 Test               | \$9                                 | 3                     | \$9                                 | 3                     |
| Serum Creatinine       | \$8.50                              | 2                     | \$8.50                              | 2                     |
| <b>Medication</b>      | <b>Annual Per-Person Cost (USD)</b> |                       | <b>Annual Per-Person Cost (USD)</b> |                       |
| TDF-FTC-EFV            | \$382                               |                       | \$156 [2]                           |                       |
| TDF-FTC                | \$382                               |                       | \$75 [2]                            |                       |

**Table 3. Staffing and Clinic Assumptions.**

| <b>Clinic Attribute</b>       | <b>Value</b>                                                               |
|-------------------------------|----------------------------------------------------------------------------|
| <b>Days worked per year</b>   | 218 days<br>(assumes 2.5 vacation days per month and 13 national holidays) |
| <b>Staff Training</b>         | 24 hours<br>(assumes two hours per week for three months)                  |
| <b>Screening : Enrollment</b> | 1.37                                                                       |
| <b>Annual Drop-out</b>        | 3%                                                                         |
| <b>Visits per Couple</b>      | 7                                                                          |

**Table 4. Key parameters used in model.** The parameters were based on the Home HTC study and other literature. For parameters with varying estimates, we chose values that best fit our data.

| Model Parameter                                            | Value [Range]                               | Reference                                         |
|------------------------------------------------------------|---------------------------------------------|---------------------------------------------------|
| <b>Duration of Disease</b>                                 |                                             |                                                   |
| <b>By CD4 Count</b>                                        |                                             |                                                   |
| Acute                                                      | 0.25 year [0.2, 0.25]                       | Johnson <i>et al.</i> [3]                         |
| >500 cells/ $\mu$ L                                        | 1.88 years                                  | Celum <i>et al.</i> , Baeten <i>et al.</i> [4, 5] |
| 500 to 350 cells/ $\mu$ L                                  | 1.22 years                                  | Celum <i>et al.</i> , Baeten <i>et al.</i> [4, 5] |
| 350 to 200 cells/ $\mu$ L                                  | 5.90 years                                  | Celum <i>et al.</i> , Baeten <i>et al.</i> [4, 5] |
| $\leq$ 200 cells/ $\mu$ L                                  | 1.96 years (95% CI: 3.0-4.3 years)          | Badri <i>et al.</i> [6]                           |
| <b>By HIV Viral Load</b>                                   |                                             |                                                   |
| Acute                                                      | 0.25 year                                   | Johnson <i>et al.</i> [3]                         |
| <1,000 copies/mL                                           | 3.13 years                                  | Celum <i>et al.</i> , Baeten <i>et al.</i> [4, 5] |
| 1,000-10,000 copies/mL                                     | 1.99 years                                  | Celum <i>et al.</i> , Baeten <i>et al.</i> [4, 5] |
| 10,000-50,000 copies/mL                                    | 4.40 years                                  | Celum <i>et al.</i> , Baeten <i>et al.</i> [4, 5] |
| >50,000 copies/mL                                          | 1.44 years                                  | Estimated                                         |
| <b>Transmission Probability*</b>                           |                                             |                                                   |
| Baseline Probability                                       | 0.0006                                      | Boily <i>et al.</i> , Powers <i>et al.</i> [7, 8] |
| Acute                                                      | 26 x Baseline [17.21, 38.27]                | Hollingsworth <i>et al.</i> [9]                   |
| VL $\leq$ 1,000 copies/mL                                  | 1 x Baseline [0.01, 11]                     | Quinn <i>et al.</i>                               |
| VL 1,000-10,000 copies/mL                                  | 5.8 x Baseline [2.26, 17.80]                | Quinn <i>et al.</i> [10]                          |
| VL 10,000-50,000 copies/mL                                 | 6.9 x Baseline [2.96, 20.15]                | Quinn <i>et al.</i> [10]                          |
| VL>50,000 copies/mL                                        | 11.9 x Baseline [5.02, 34.88]               | Quinn <i>et al.</i> [10]                          |
| <b>Intervention Efficacy for Reducing HIV Transmission</b> |                                             |                                                   |
| Antiretroviral therapy (ART)                               | 96% [0.73, 0.99]                            | Cohen <i>et al.</i> [11]                          |
| Pre-exposure prophylaxis (PrEP)                            | 92% [0.77, 0.98]                            | Baeten <i>et al.</i> [5]                          |
| <b>Baseline ART Coverage</b>                               |                                             |                                                   |
| Before 2000                                                | 0%                                          | Windisch <i>et al.</i> [12]                       |
| 2013                                                       | 40% of all HIV-positive persons             | Barnabas <i>et al.</i> [13]                       |
| <b>Prevalence of Circumcision</b>                          |                                             |                                                   |
| <b>2012</b>                                                | 30%                                         | Uganda AIS [14]                                   |
| <b>Costs‡</b>                                              |                                             |                                                   |
| ART                                                        | \$269 per person per year                   | CHAI [15]                                         |
| Hospitalization: pre-ART<br>CD4 $\leq$ 200 cells/ $\mu$ L  | \$27.30 per HIV-positive person<br>per year | Meyer-Rath <i>et al.</i> [16]                     |
| Hospitalization: pre-ART<br>CD4 200-350 cells/ $\mu$ L     | \$13.08 per HIV-positive person<br>per year | Meyer-Rath <i>et al.</i> [16]                     |
| Hospitalization: pre-ART<br>CD4>350 cells/ $\mu$ L         | \$8.80 per HIV-positive person per<br>year  | Meyer-Rath <i>et al.</i> [16]                     |
| Hospitalization: post-ART<br>CD4 200-350 cells/ $\mu$ L    | \$25.04 per HIV-positive person<br>per year | Meyer-Rath <i>et al.</i> [16]                     |
| Hospitalization: post-ART<br>CD4>350 cells/ $\mu$ L        | \$10.15 per HIV-positive person<br>per year | Meyer-Rath <i>et al.</i> [16]                     |

\*Probability of HIV transmission per coital act assumes that HIV transmission is a Bernoulli process.

‡Extrapolated and calibrated using country GDP.

Table 5. Utility weights for estimating disability-adjusted life-years averted.

| <b>Health State</b>                 | <b>DALY Weight [17]</b> |
|-------------------------------------|-------------------------|
| <b>HIV-negative</b>                 | <b>0</b>                |
| <b>HIV-positive<br/>CD4&gt;350</b>  | <b>0.053</b>            |
| <b>HIV-positive CD4<br/>200-350</b> | <b>0.221</b>            |
| <b>HIV-positive<br/>CD4&lt;200</b>  | <b>0.547</b>            |
| <b>HIV-positive on ART</b>          | <b>0.053</b>            |
| <b>Dead</b>                         | <b>1</b>                |

## References

1. Africa Health Workforce Observatory. Human Resources for Health: Country Profile, Uganda. In: WHO; 2009.
2. Antiretroviral (ARV) Ceiling Price List. In: The Clinton Health Access Initiative; 2013.
3. Johnson L, Dorrington R, Bradshaw D, Van Wyk V, Rehle T. Sexual behaviour patterns in South Africa and their association with the spread of HIV: Insights from a mathematical model. *Demographic Research* 2009,**21**:289 - 340.
4. Celum C, Wald A, Lingappa JR, Magaret AS, Wang RS, Mugo N, *et al.* Acyclovir and transmission of HIV-1 from persons infected with HIV-1 and HSV-2. *N Engl J Med* 2010,**362**:427-439.
5. Baeten JM, Donnell D, Ndase P, Mugo NR, Campbell JD, Wangisi J, *et al.* Antiretroviral prophylaxis for HIV prevention in heterosexual men and women. *N Engl J Med* 2012,**367**:399-410.
6. Badri M, Bekker LG, Orrell C, Pitt J, Cilliers F, Wood R. Initiating highly active antiretroviral therapy in sub-Saharan Africa: an assessment of the revised World Health Organization scaling-up guidelines. *AIDS* 2004,**18**:1159-1168.
7. Boily MC, Baggaley RF, Wang L, Masse B, White RG, Hayes RJ, *et al.* Heterosexual risk of HIV-1 infection per sexual act: systematic review and meta-analysis of observational studies. *Lancet Infect Dis* 2009,**9**:118-129.
8. Powers KA, Poole C, Pettifor AE, Cohen MS. Rethinking the heterosexual infectivity of HIV-1: a systematic review and meta-analysis. *Lancet Infect Dis* 2008,**8**:553-563.
9. Hollingsworth TD, Anderson RM, Fraser C. HIV-1 transmission, by stage of infection. *J Infect Dis* 2008,**198**:687-693.
10. Quinn TC, Wawer MJ, Sewankambo N, Serwadda D, Li C, Wabwire-Mangen F, *et al.* Viral load and heterosexual transmission of human immunodeficiency virus type 1. Rakai Project Study Group. *N Engl J Med* 2000,**342**:921-929.
11. Cohen MS, Chen YQ, McCauley M, Gamble T, Hosseinipour MC, Kumarasamy N, *et al.* Prevention of HIV-1 infection with early antiretroviral therapy. *N Engl J Med* 2011,**365**:493-505.
12. Windisch R, Waiswa P, Neuhann F, Scheibe F, de Savigny D. Scaling up antiretroviral therapy in Uganda: using supply chain management to appraise health systems strengthening. *Global Health* 2011,**7**:25.
13. Barnabas RV, Van Rooyen H, Baeten J, Tumwesigye E, Phakathi Z, Tumwebaze H, *et al.* High testing uptake and linkages to HIV treatment through home-based HIV counseling and testing and facilitated referral in Kabwohe, Uganda and KwaZulu-Natal (KZN), South Africa. In: *HIV Treatment as Prevention Workshop*. Vancouver, Canada; 2012.
14. International UMoHal. 2011 Uganda AIDS Indicator Survey: Key Findings. In. Maryland, USA: MOH and ICF International; 2012.
15. Multi-Country Analysis of Treatment Costs for HIV/AIDS (MATCH): Unit costing at 161 Representative Facilities in Ethiopia, Malawi, Rwanda, South Africa and Zambia. In; 2012.
16. Meyer-Rath G, Brennan AT, Fox MP, Modisenyane T, Tshabangu N, Mohapi L, *et al.* Rates and cost of hospitalization before and after initiation of antiretroviral therapy in urban and rural settings in South Africa. *J Acquir Immune Defic Syndr* 2013,**62**:322-328.
17. Salomon JA, Vos T, Hogan DR, Gagnon M, Naghavi M, Mokdad A, *et al.* Common values in assessing health outcomes from disease and injury: disability weights measurement study for the Global Burden of Disease Study 2010. *Lancet* 2012,**380**:2129-2143.
